# Supplementary figures and images for: Residual ctDNA after treatment predicts early relapse in patients with early-stage non-small cell lung cancer
Source: PubMed Central journal article supplement — Ann Oncol. 2022 May;33(5):500–10. doi: 10.1016/j.annonc.2022.02.007 (PMC9067454; doi:10.1016/j.annonc.2022.02.007), 2022-05

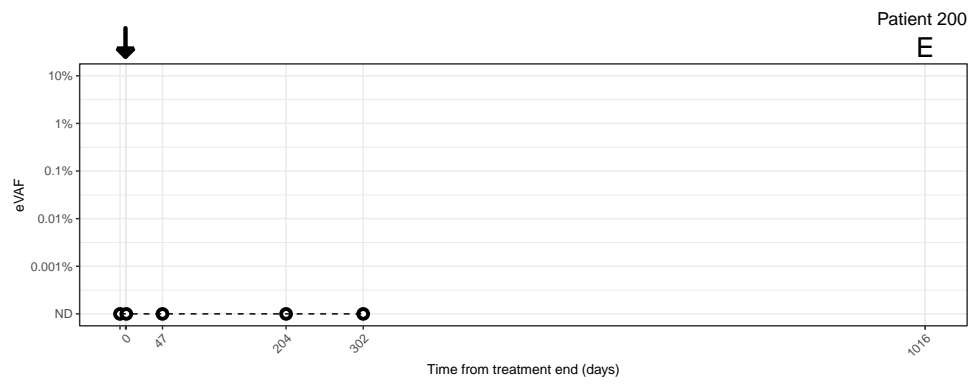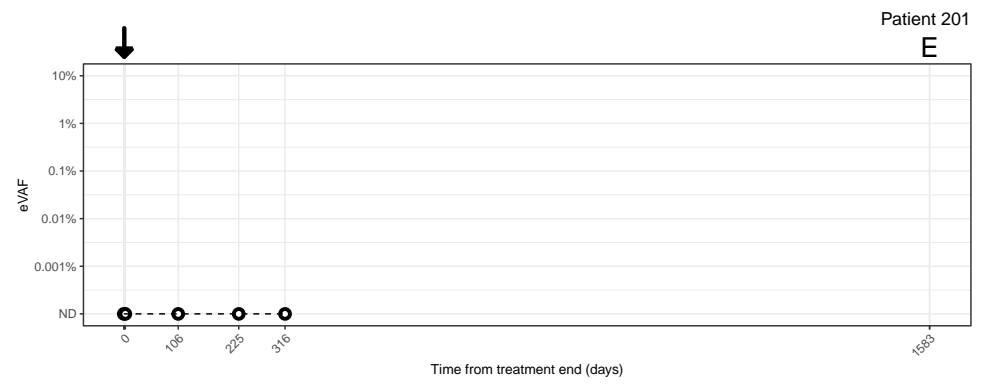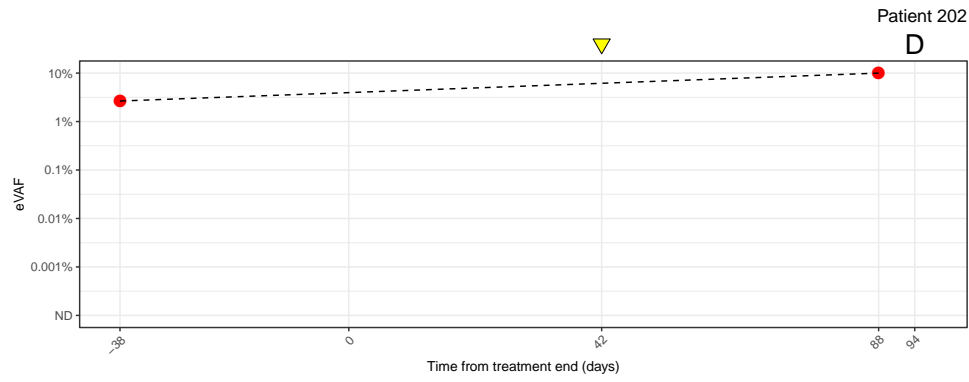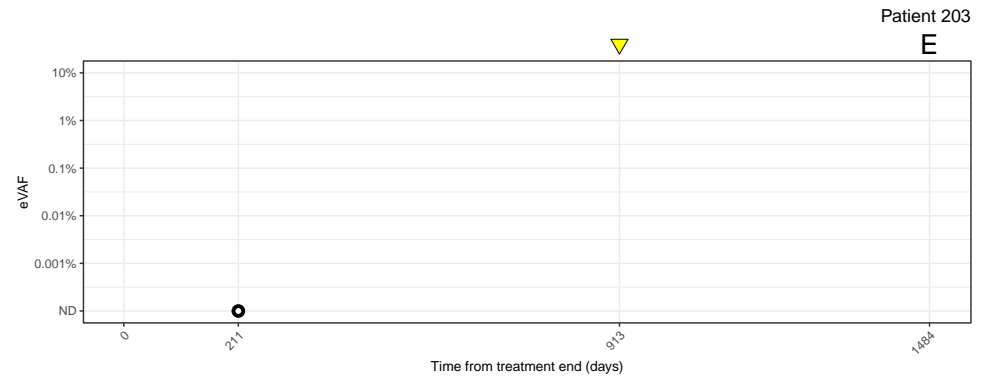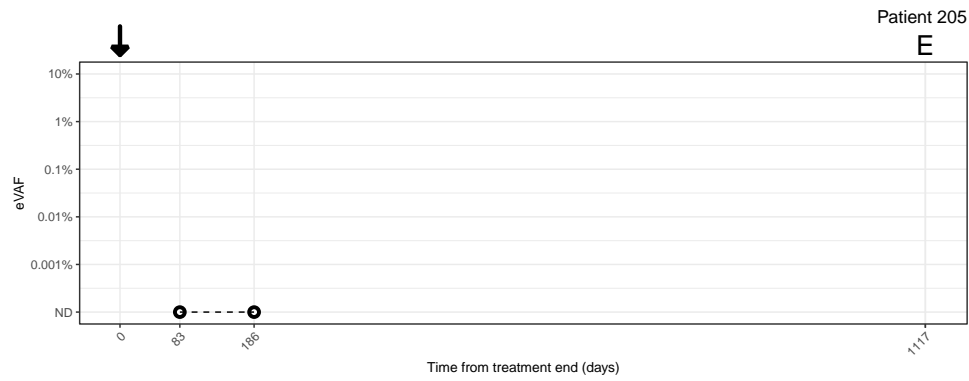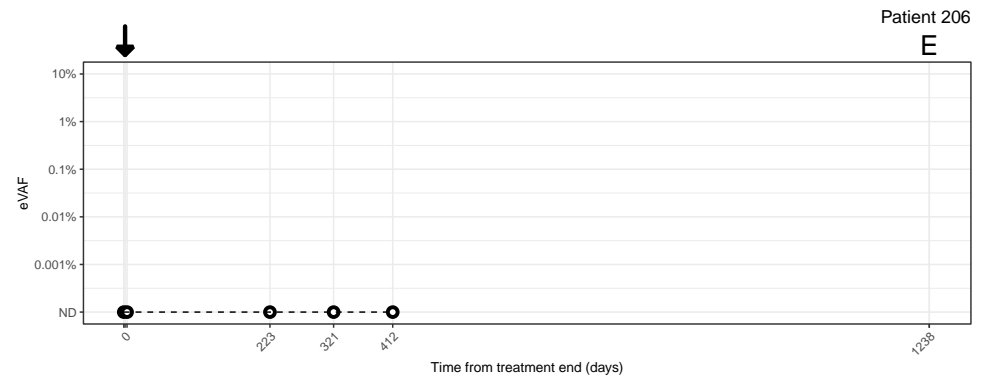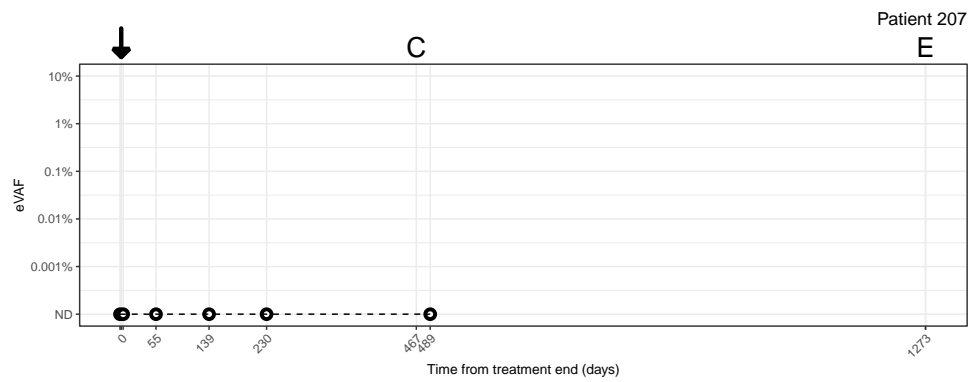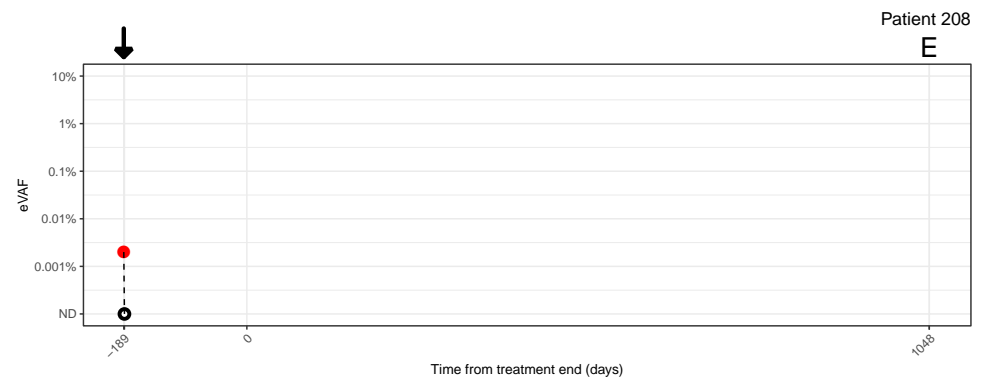

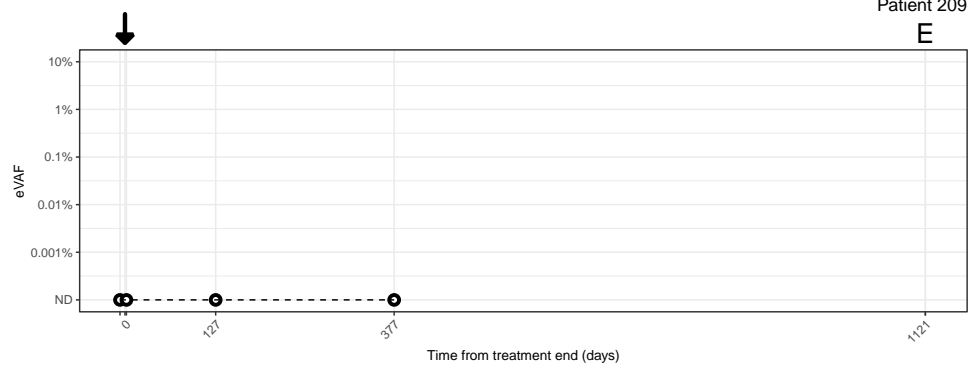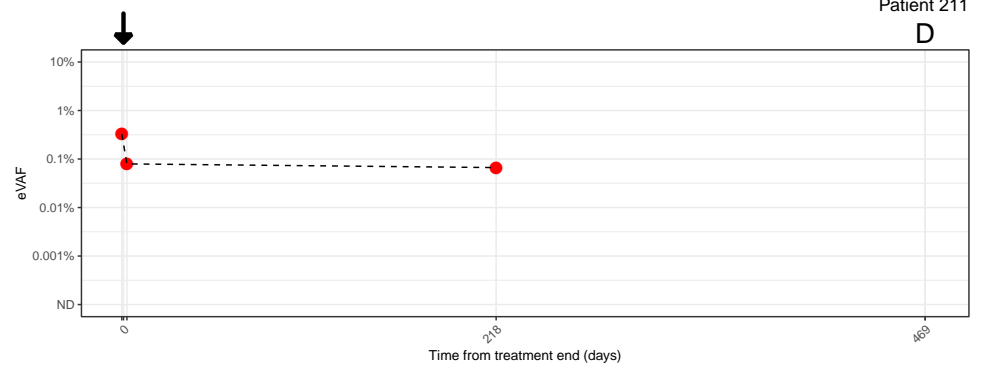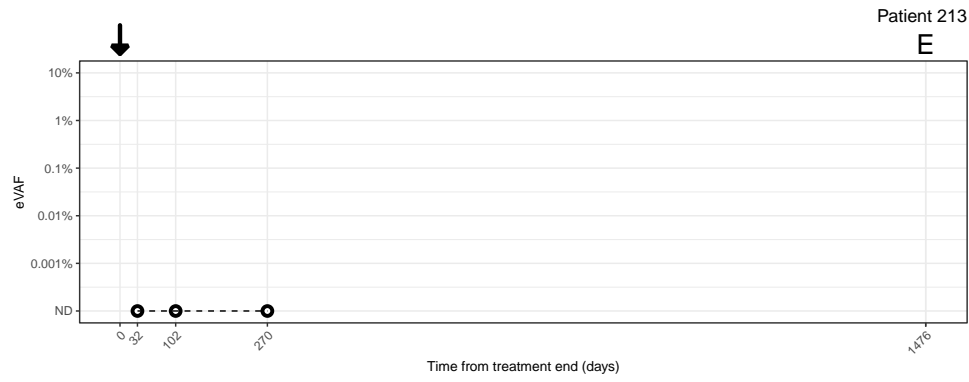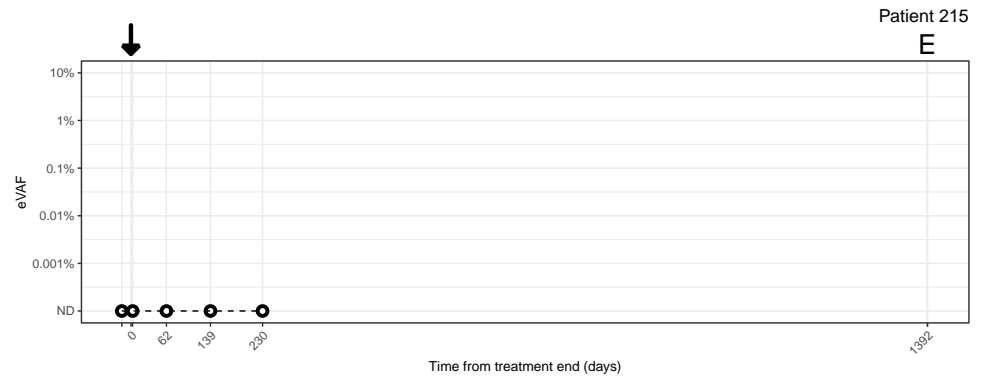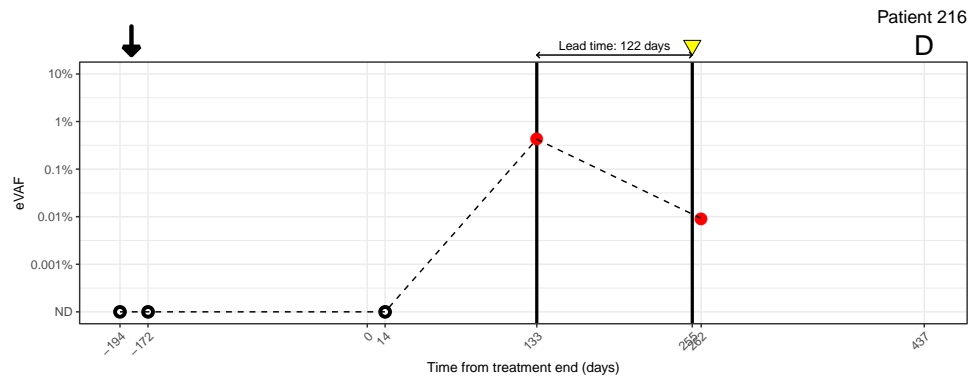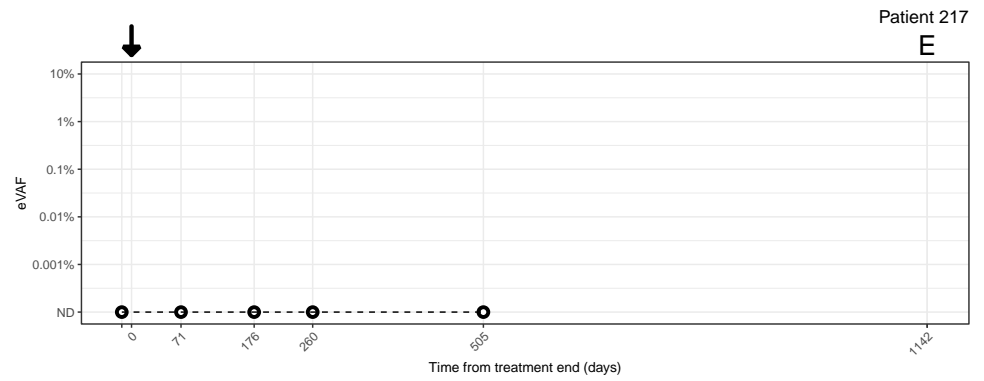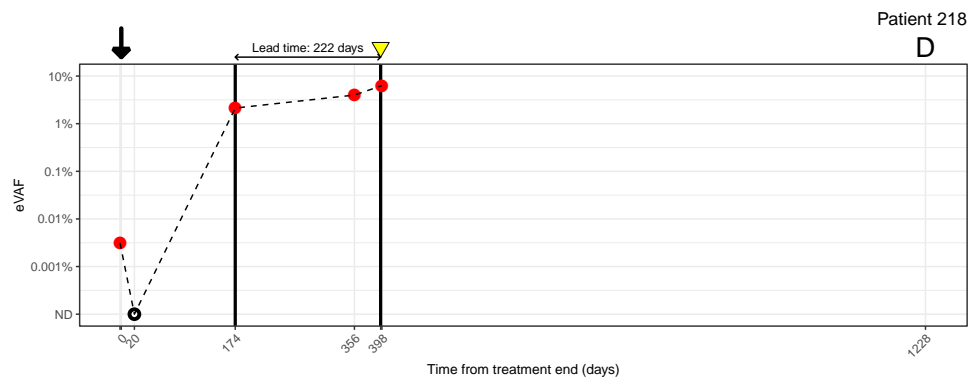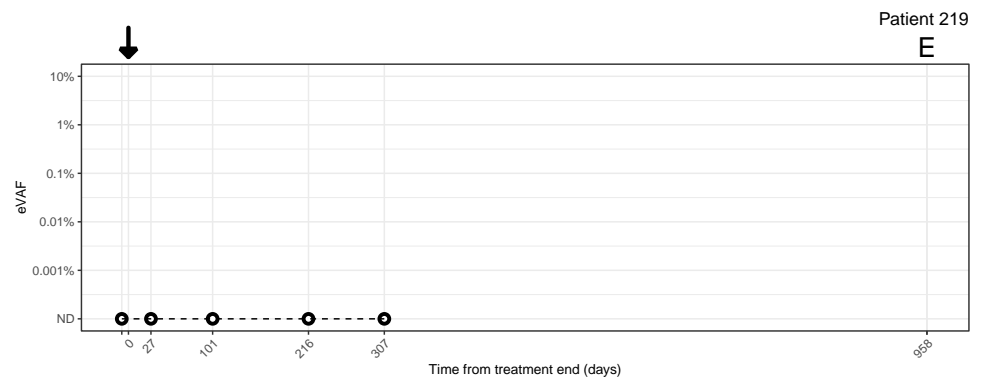

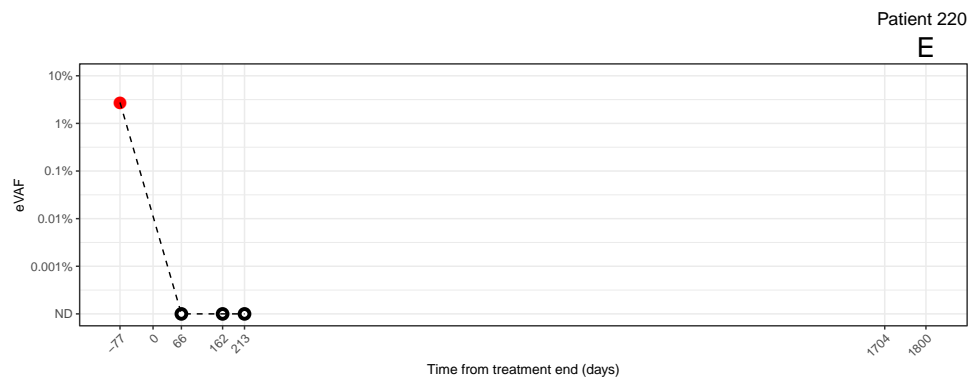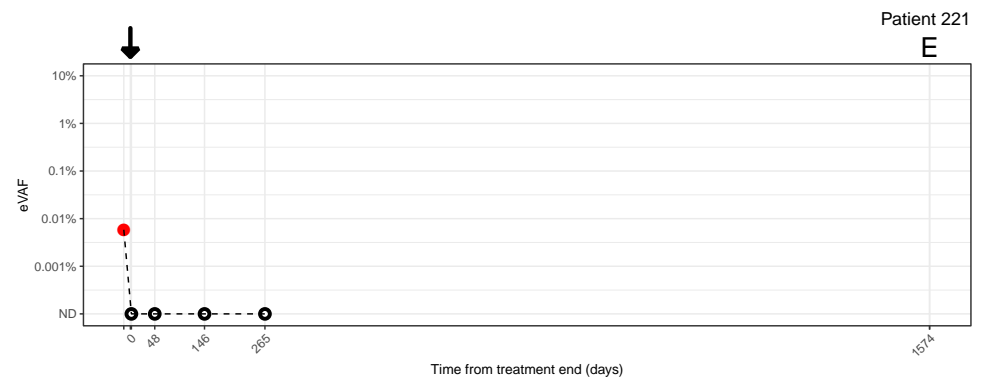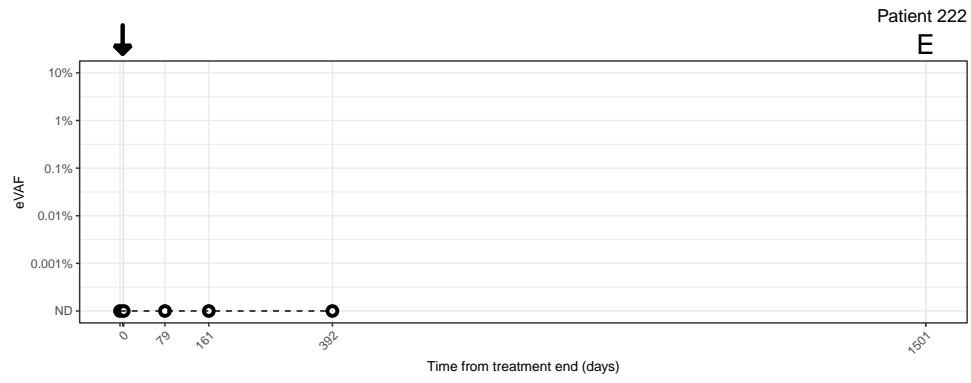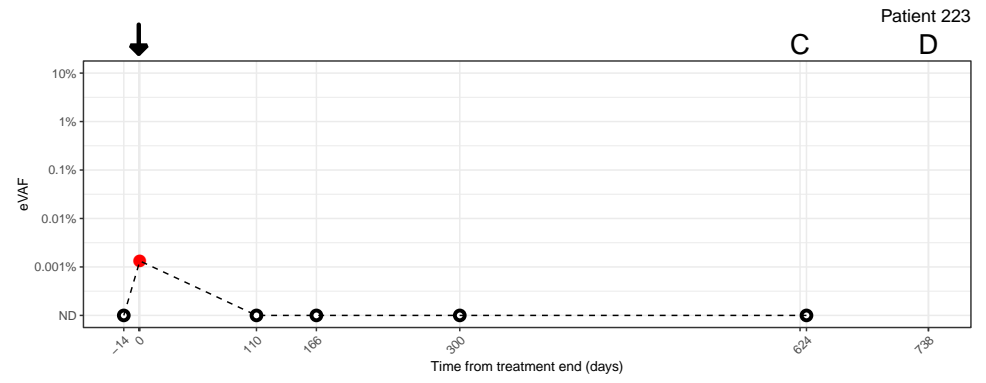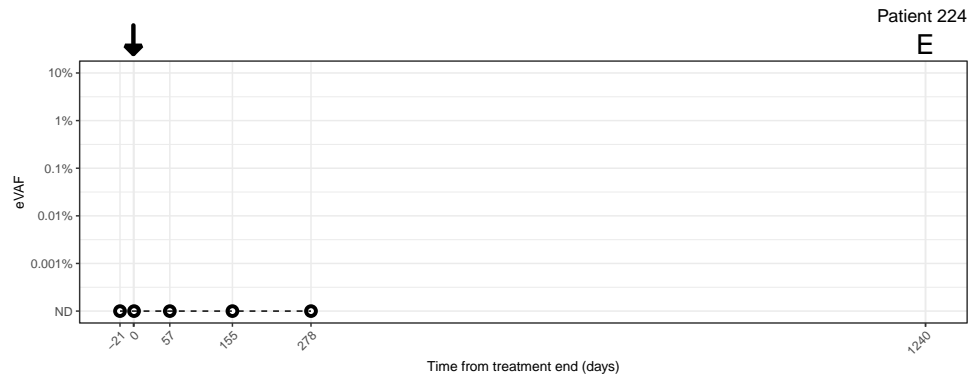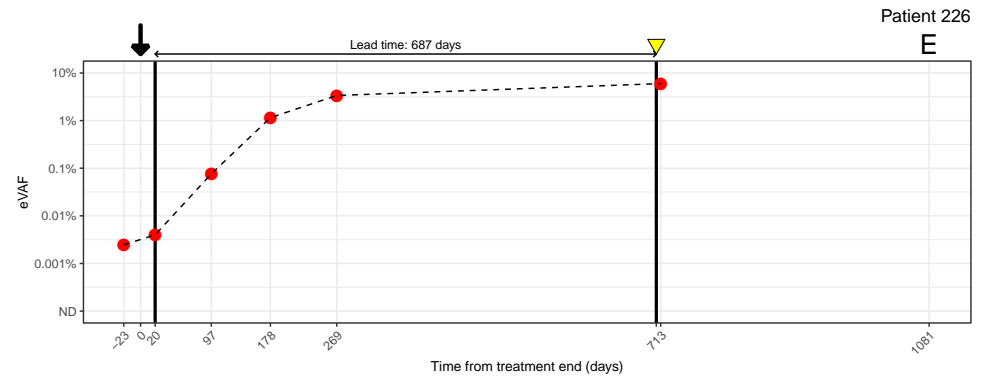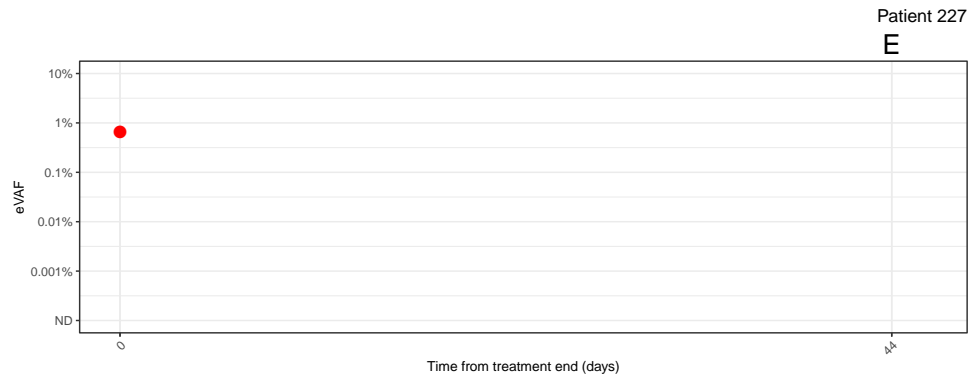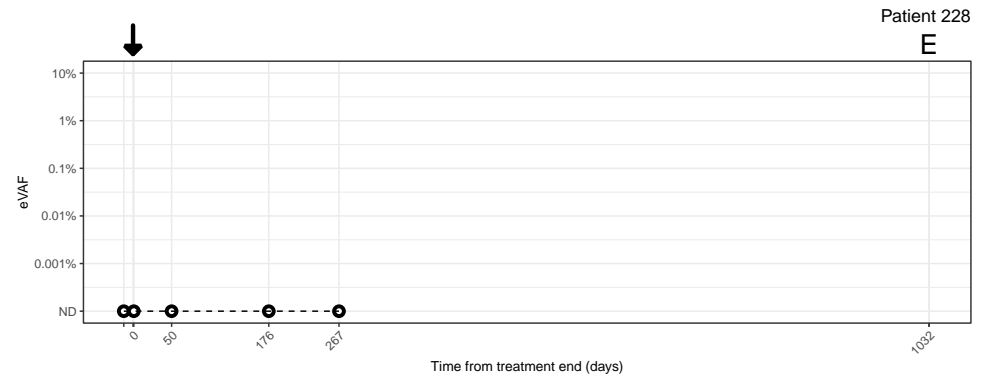

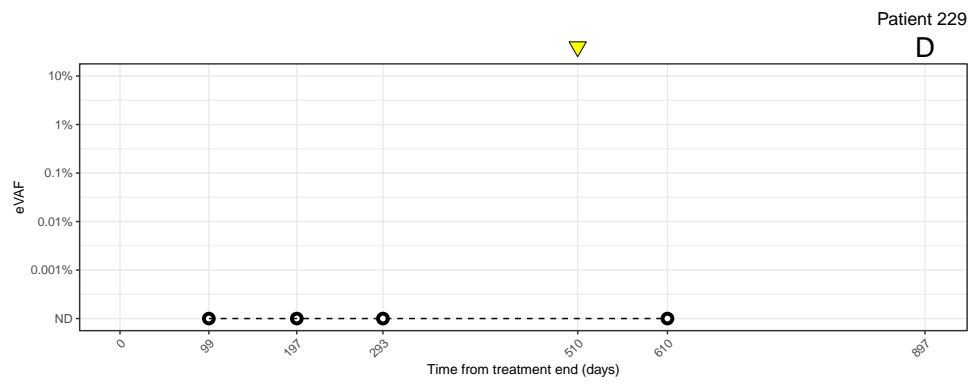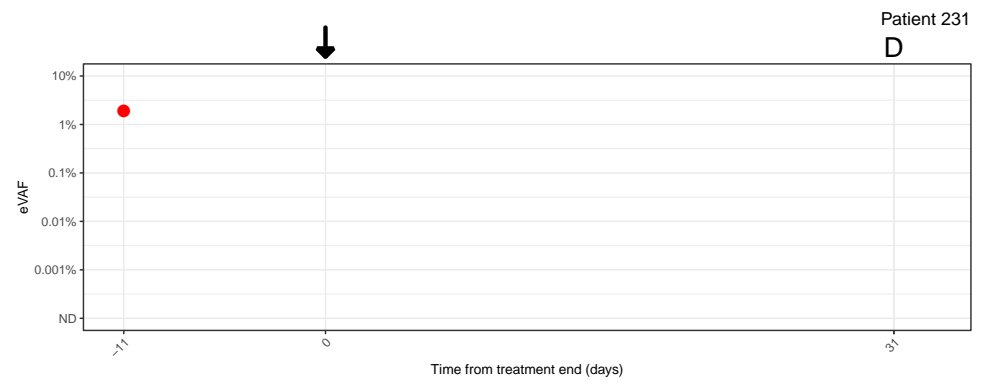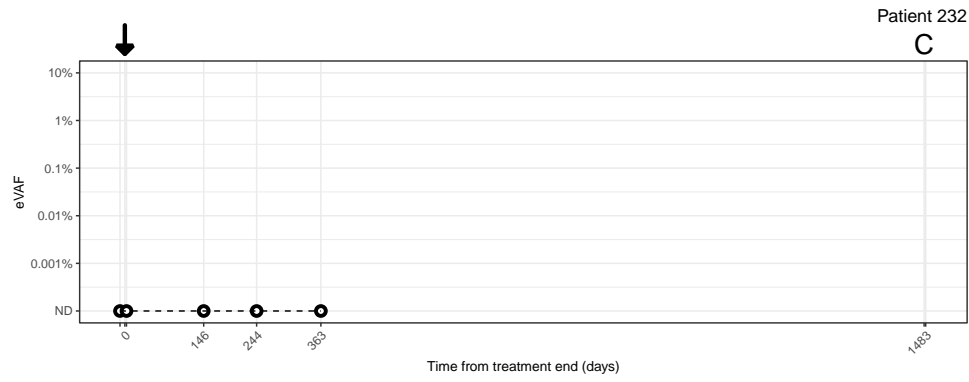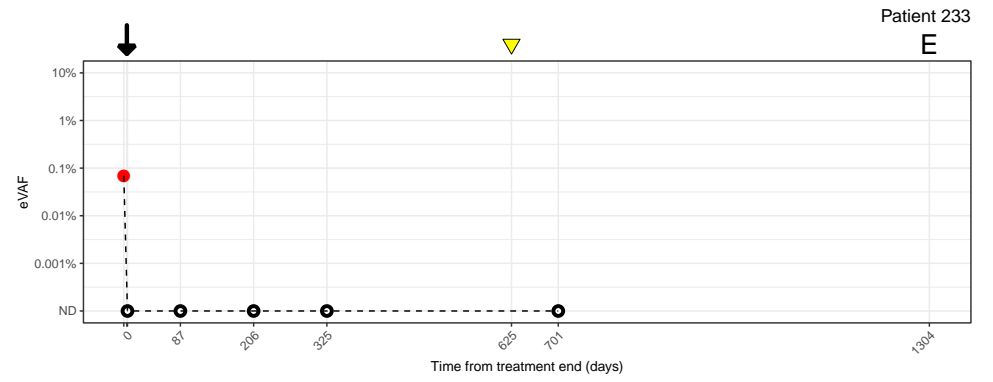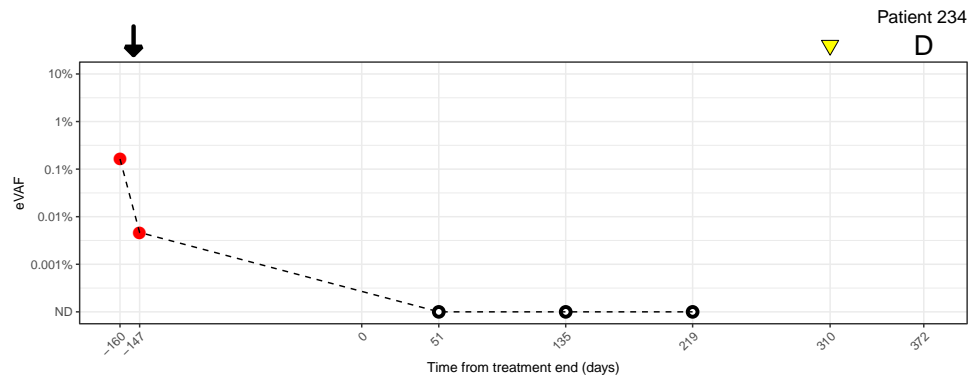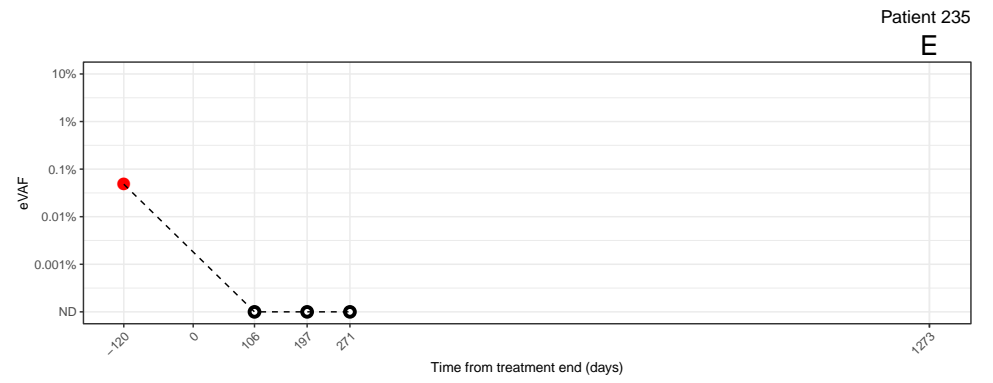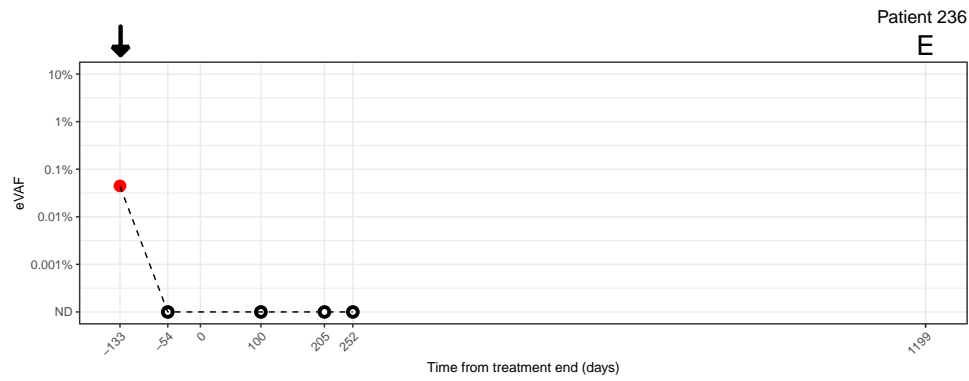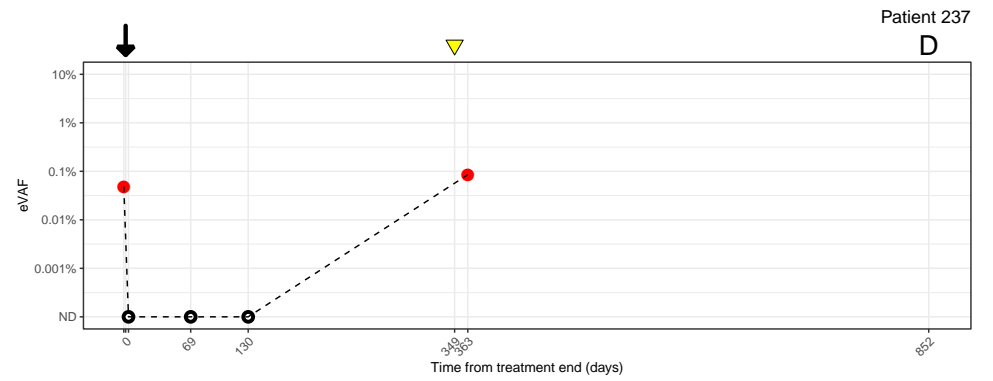

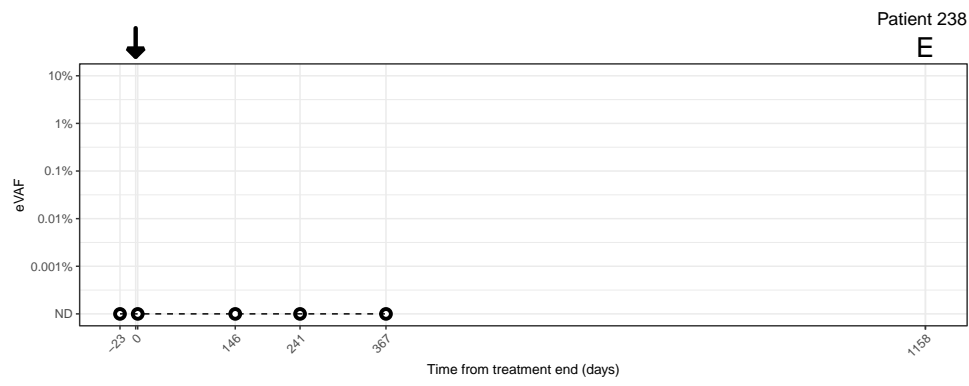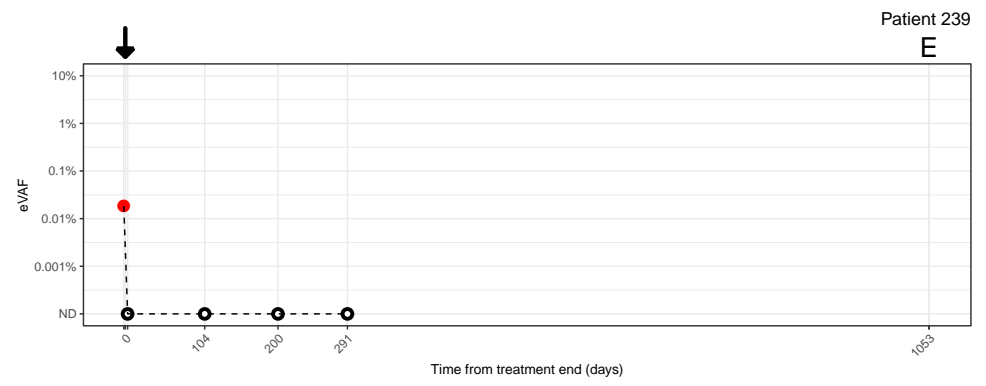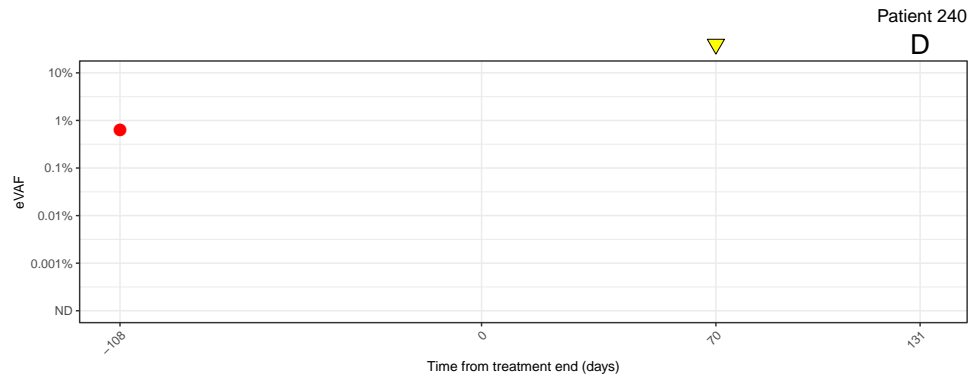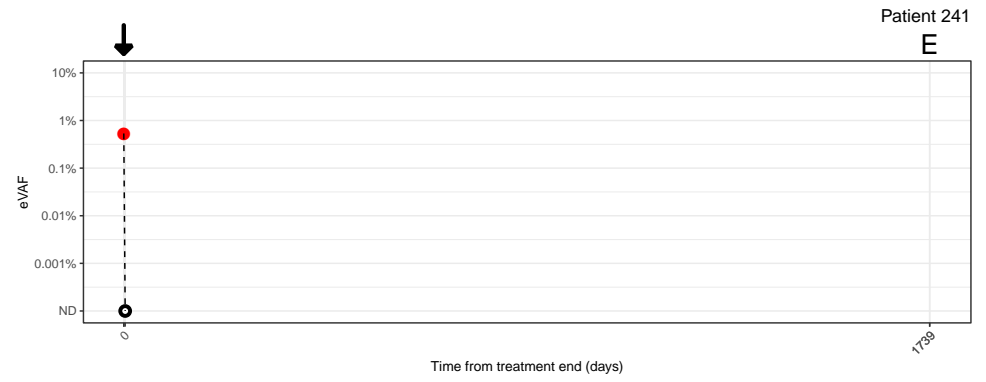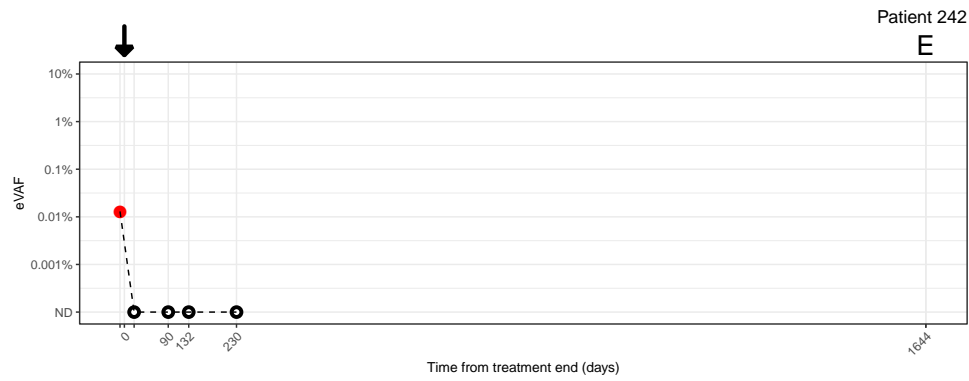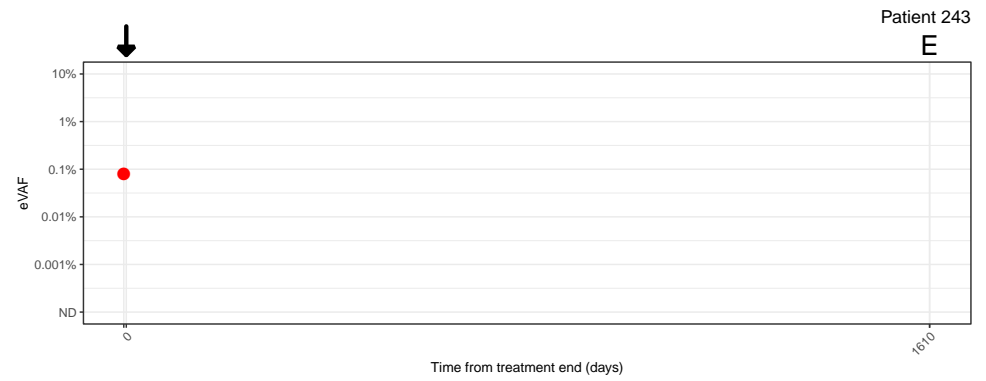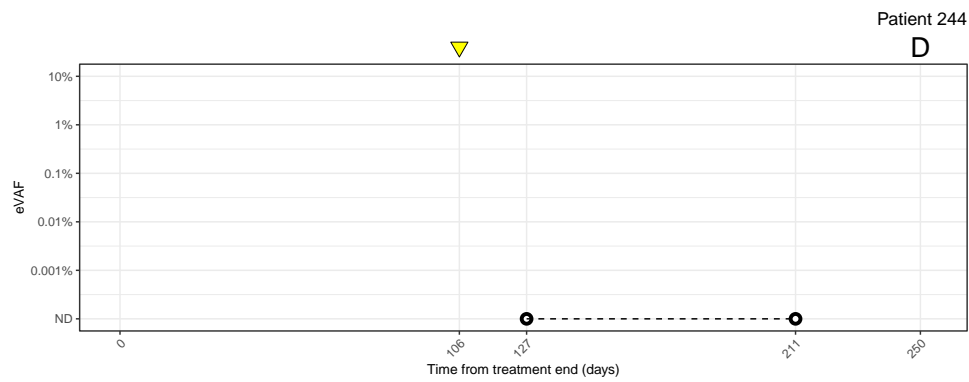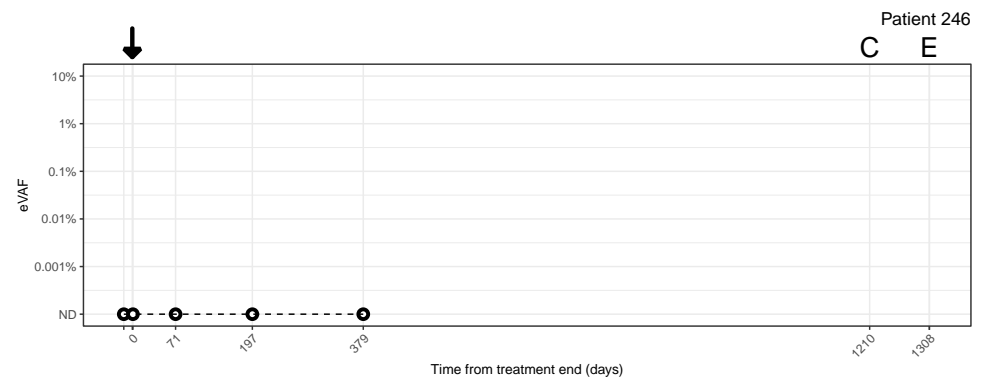

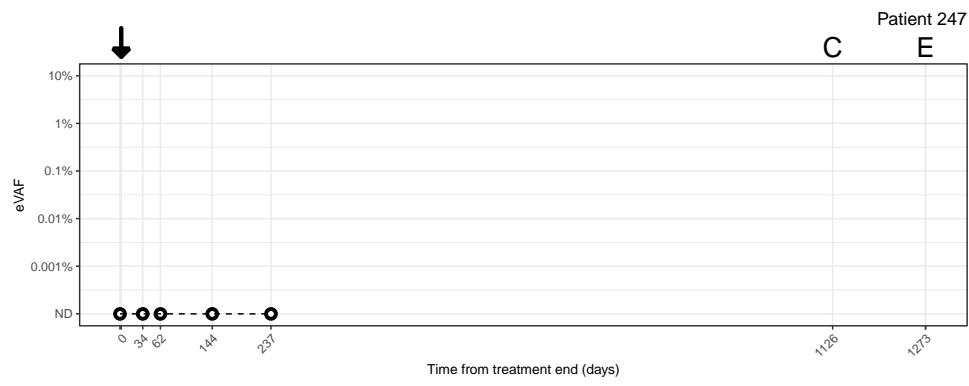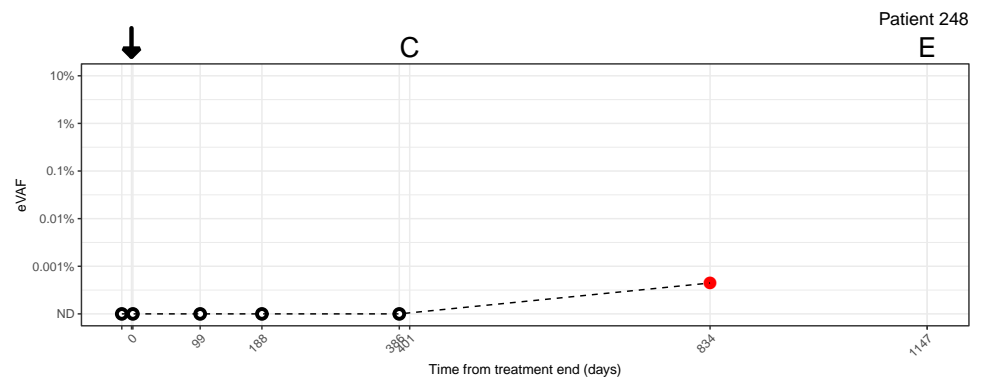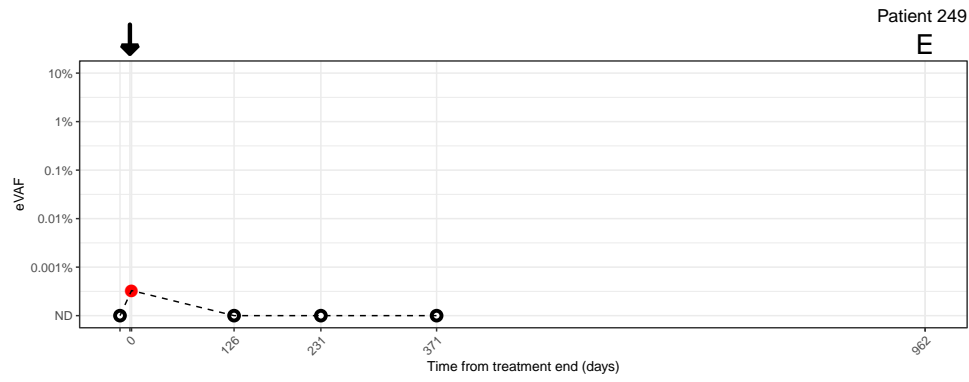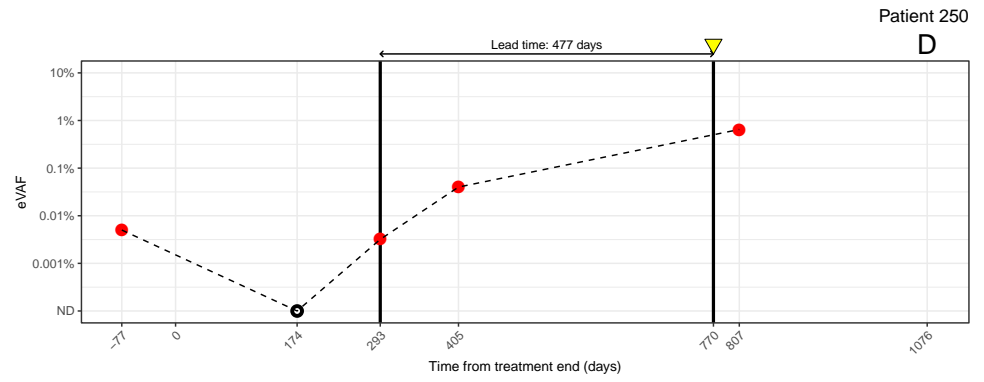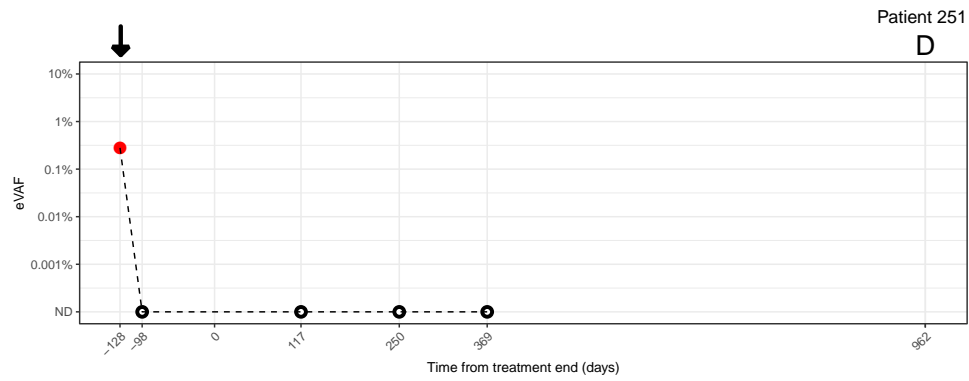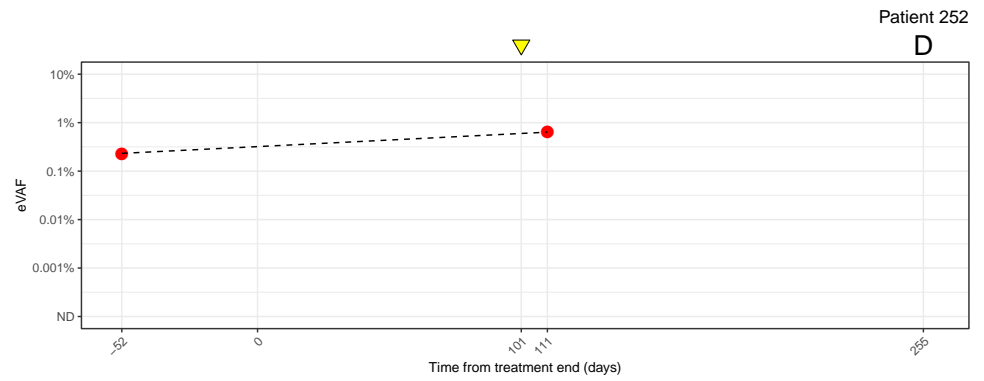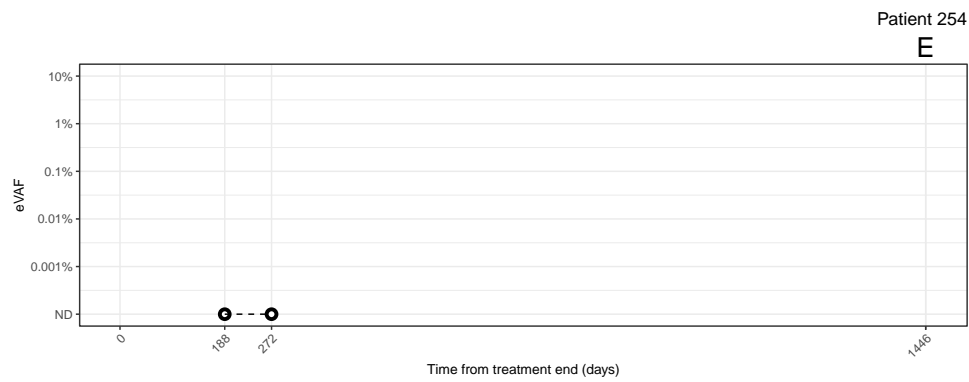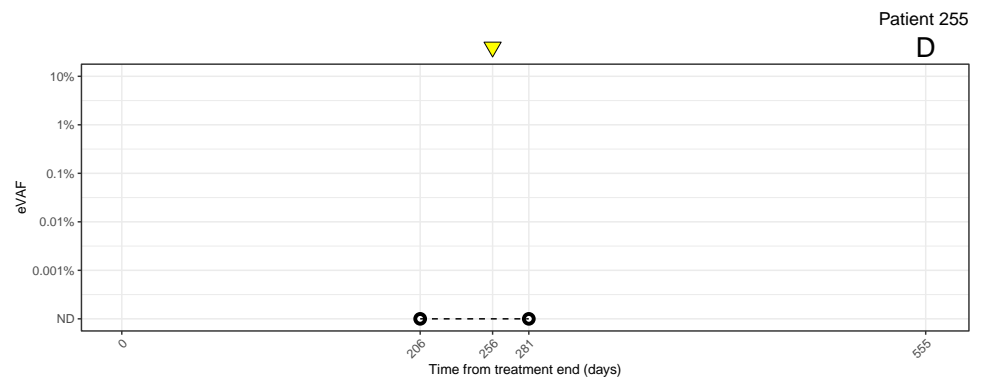

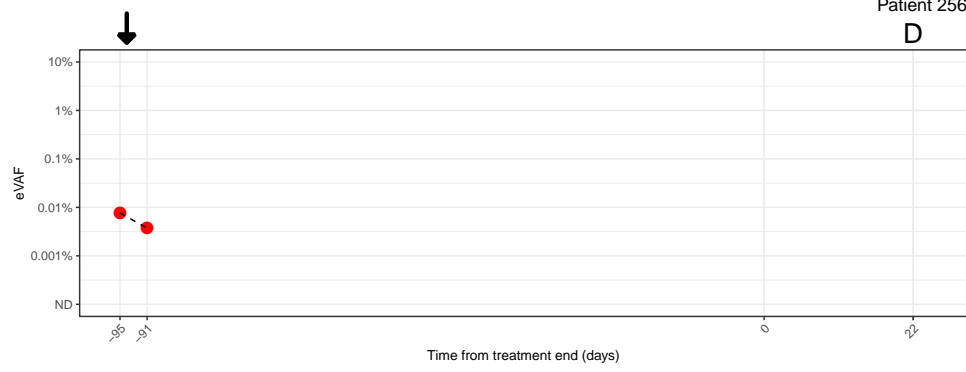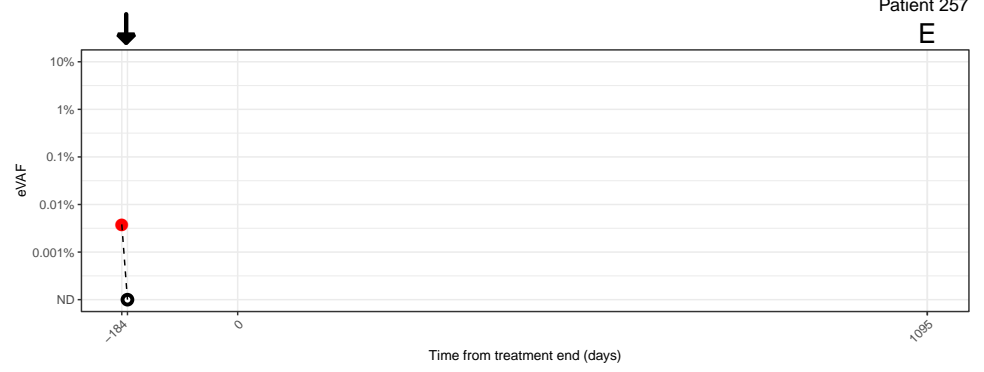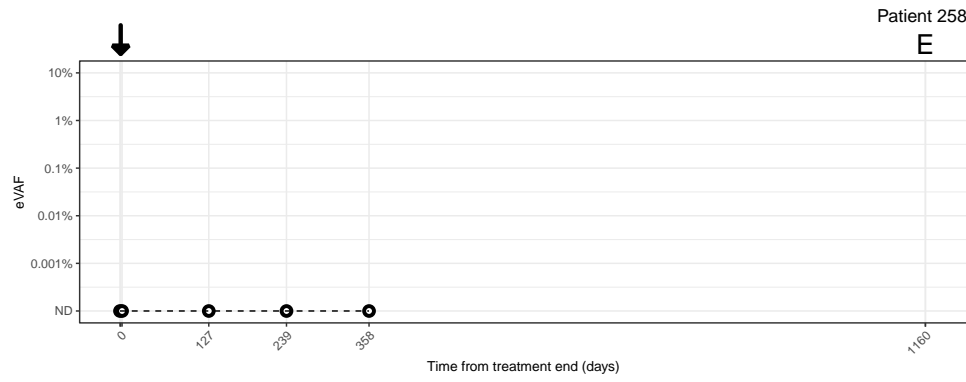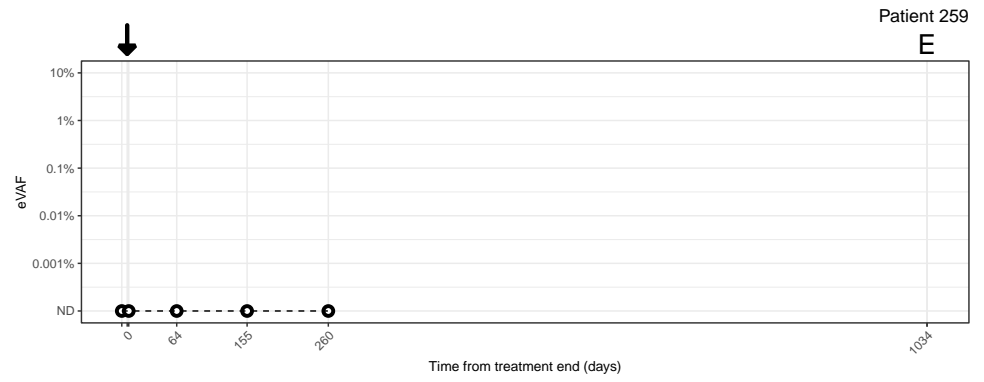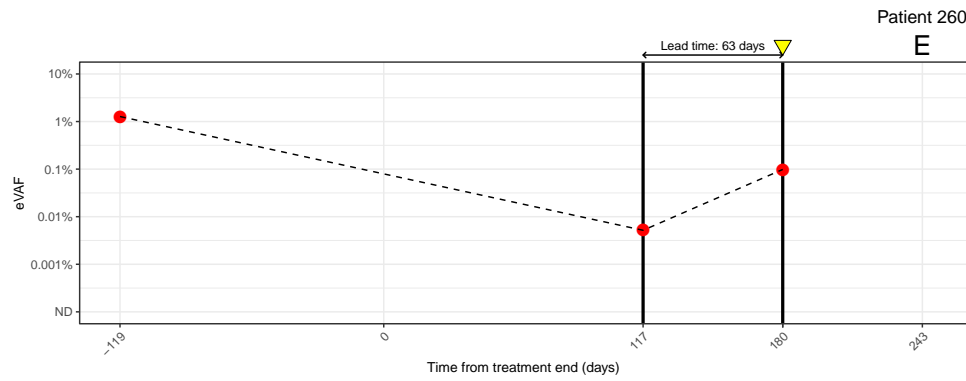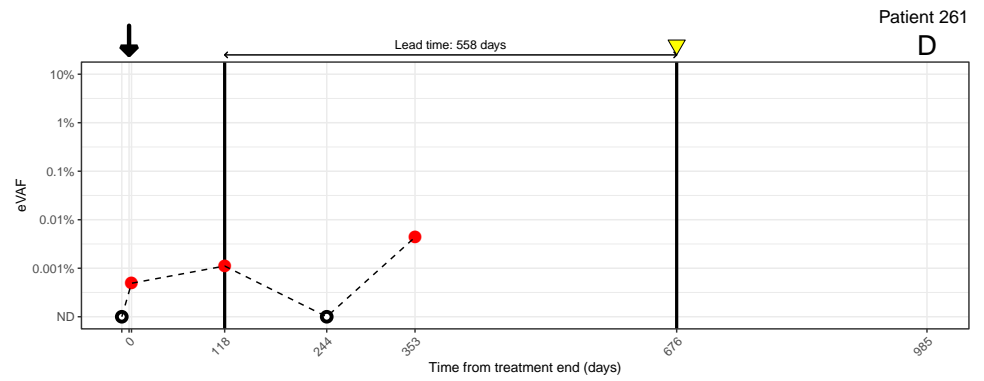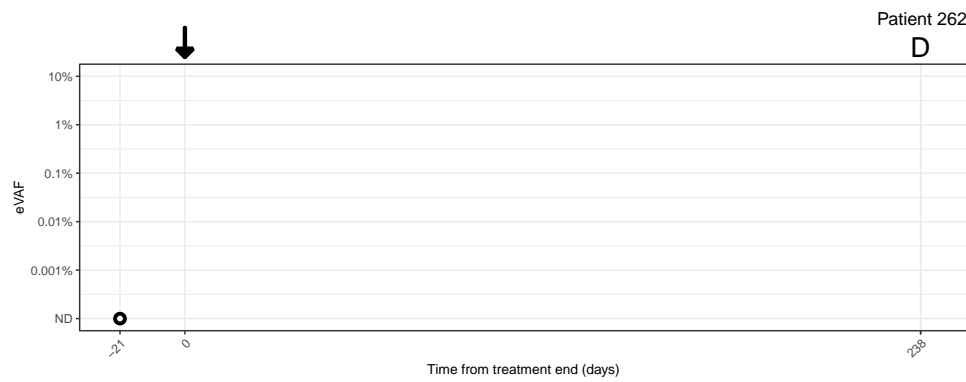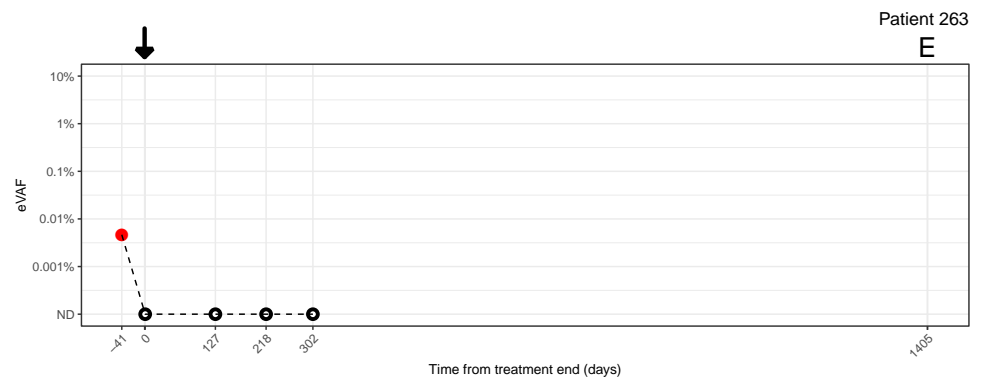

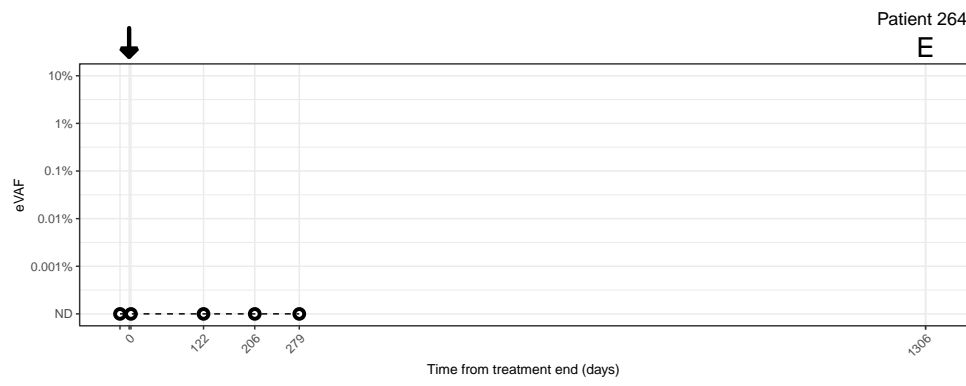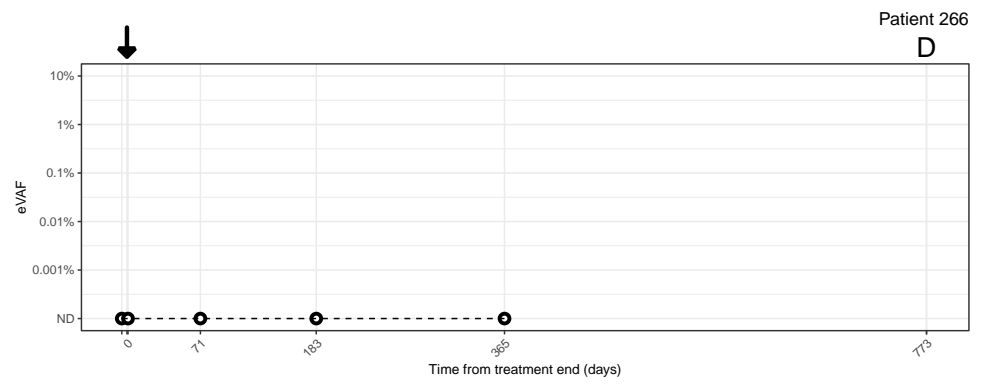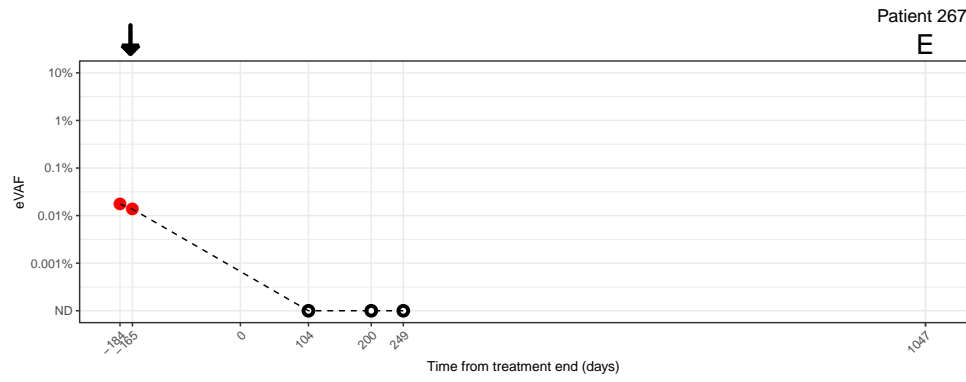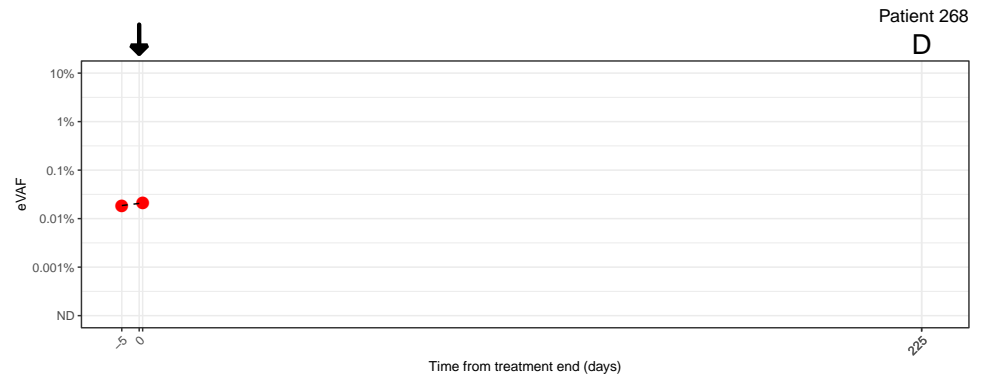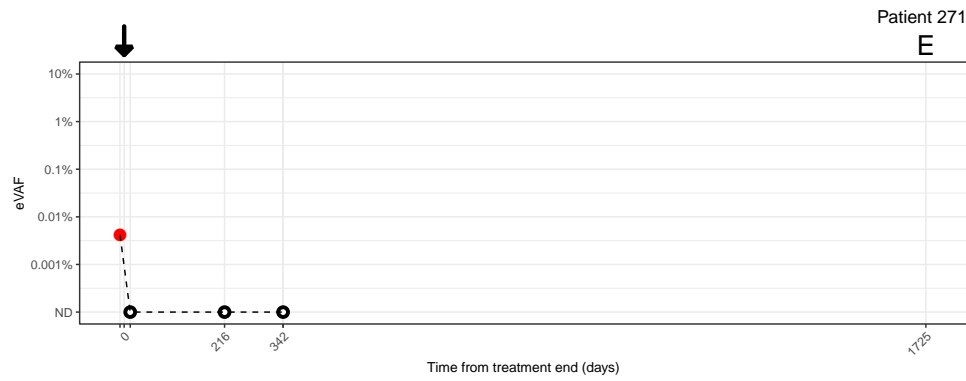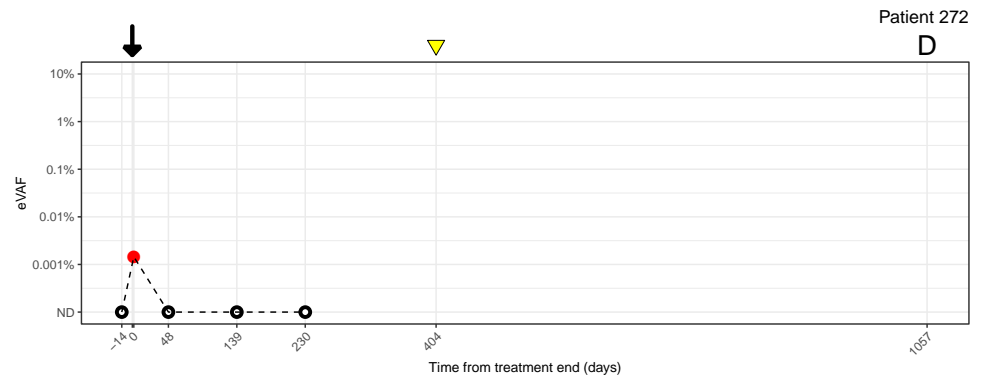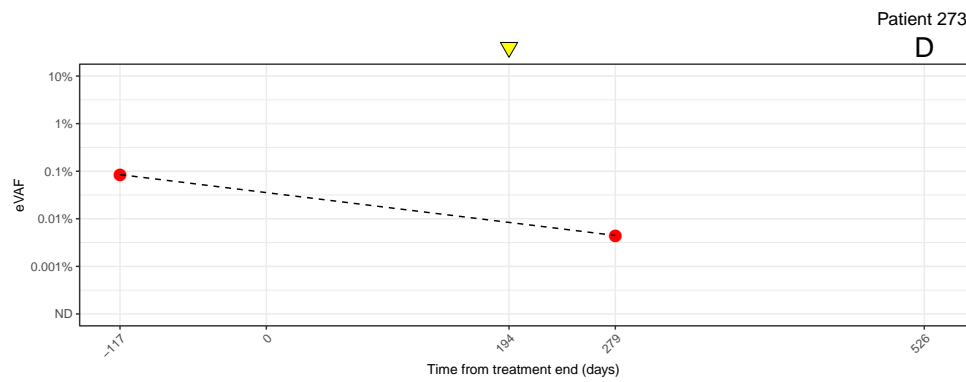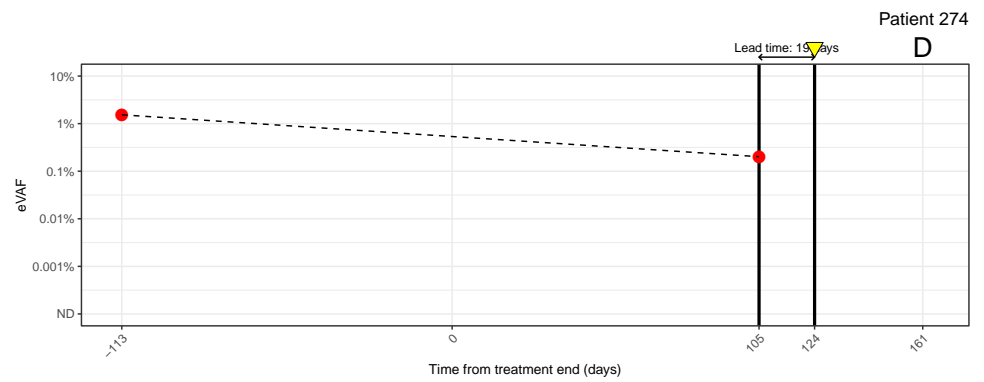



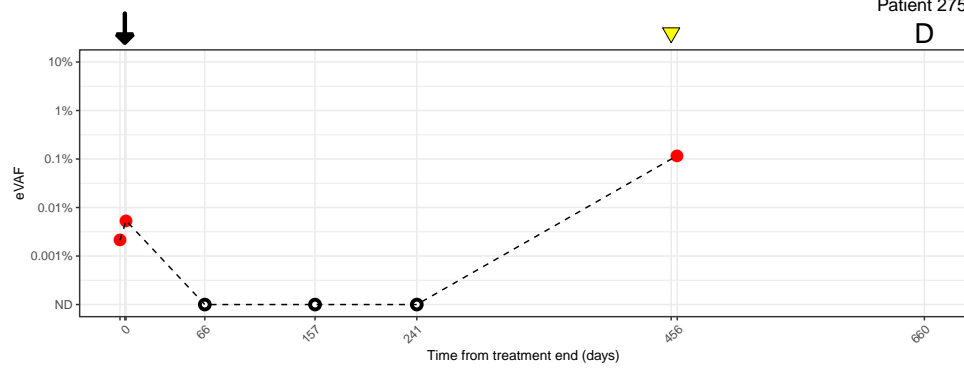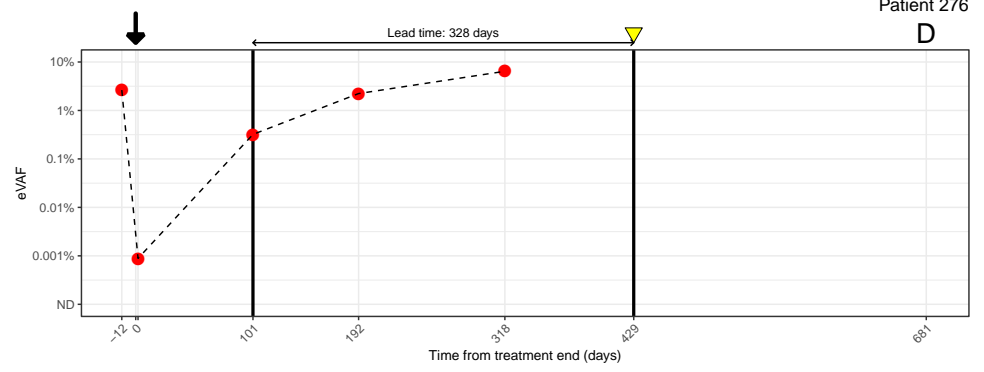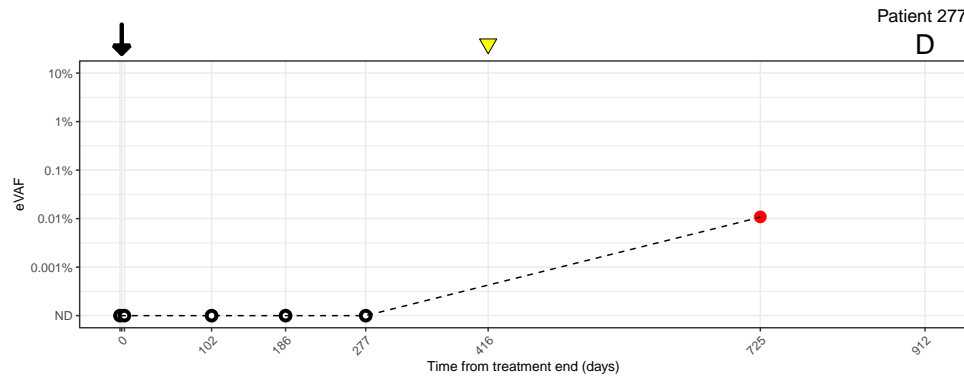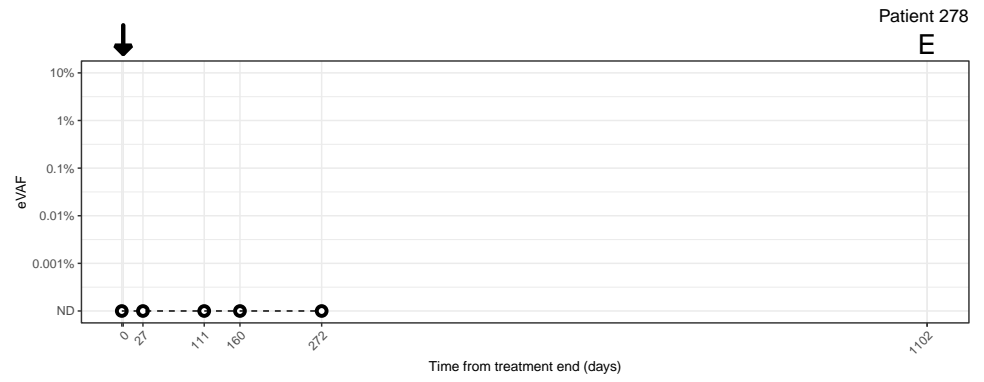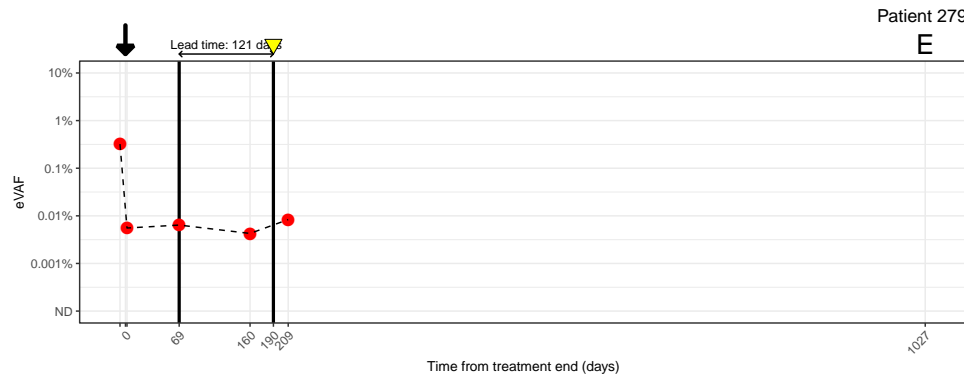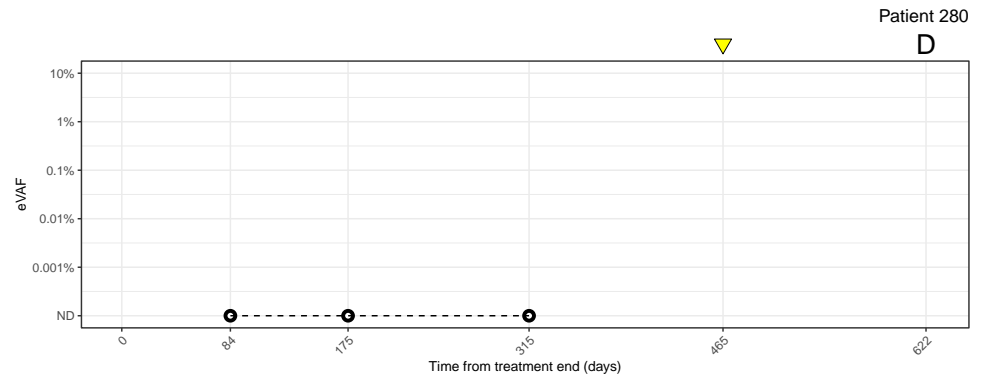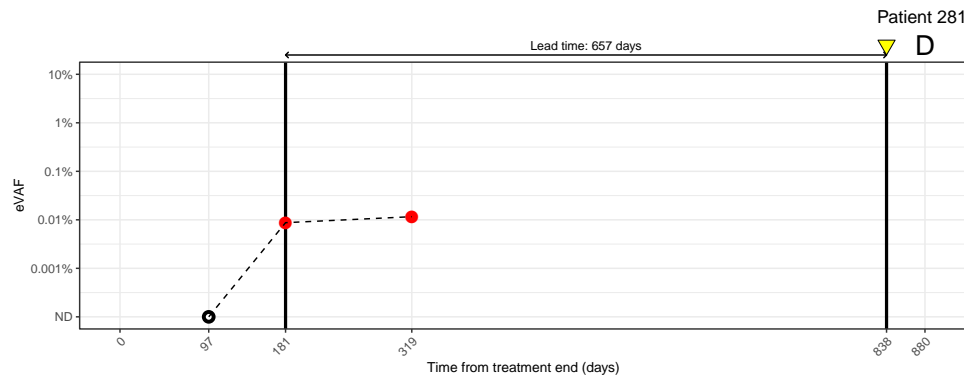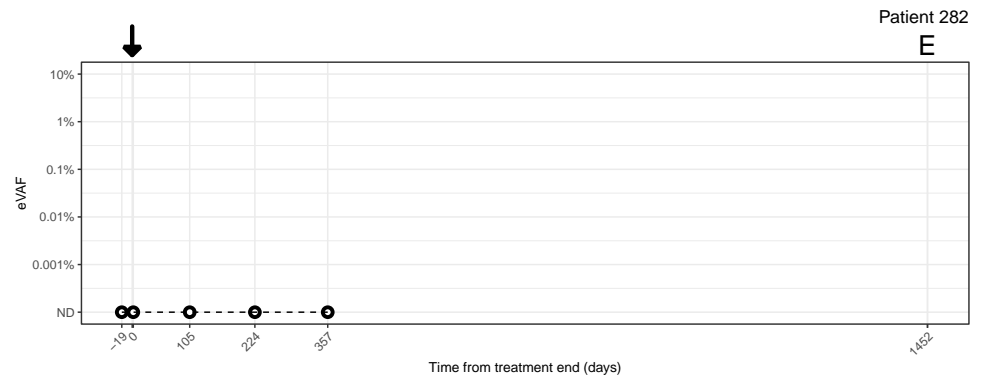

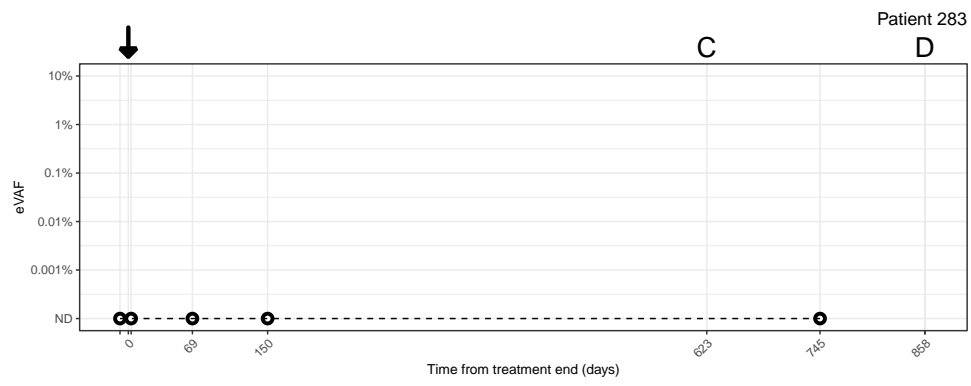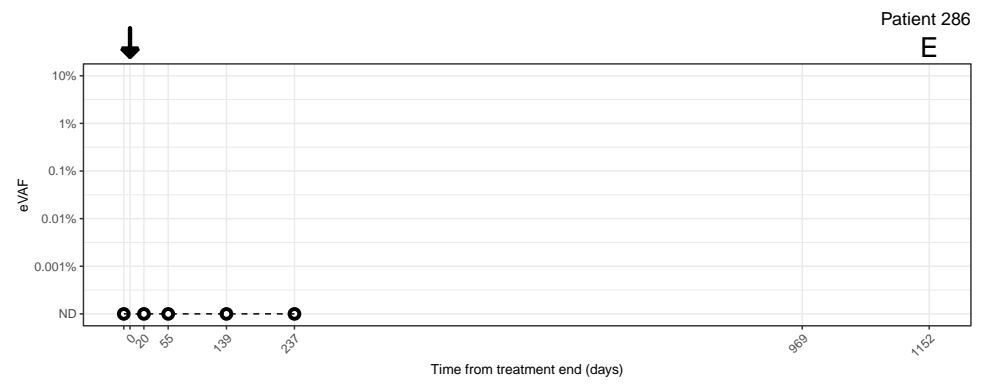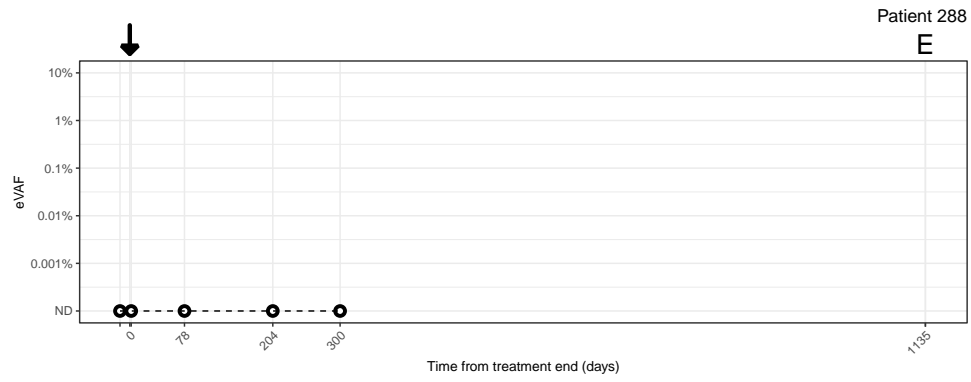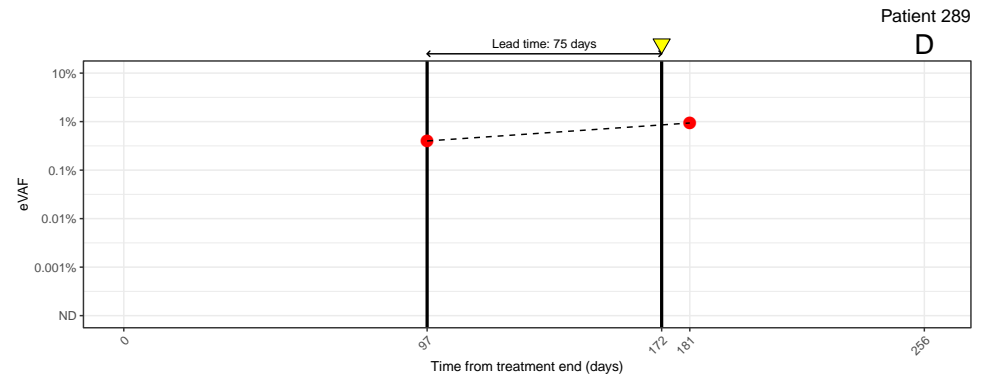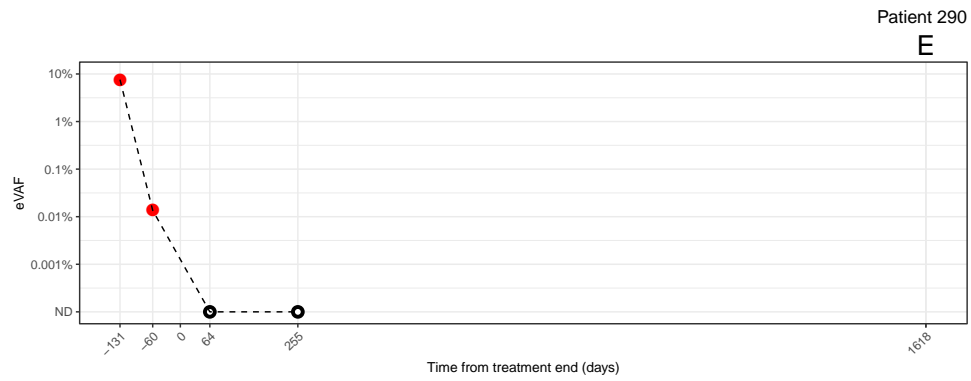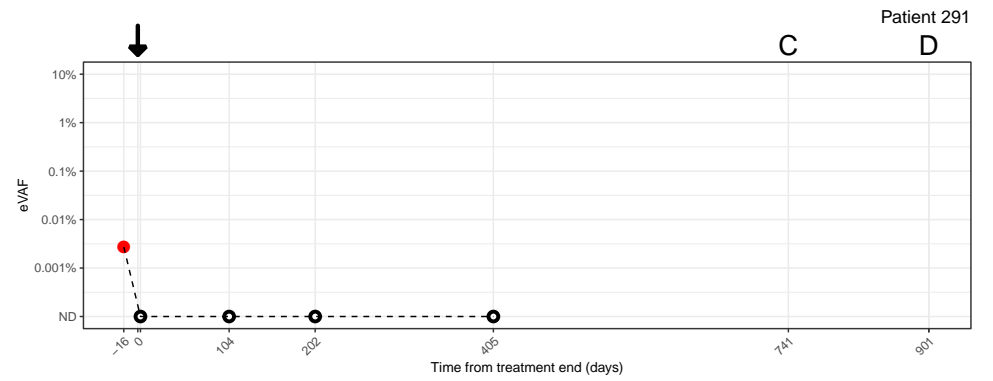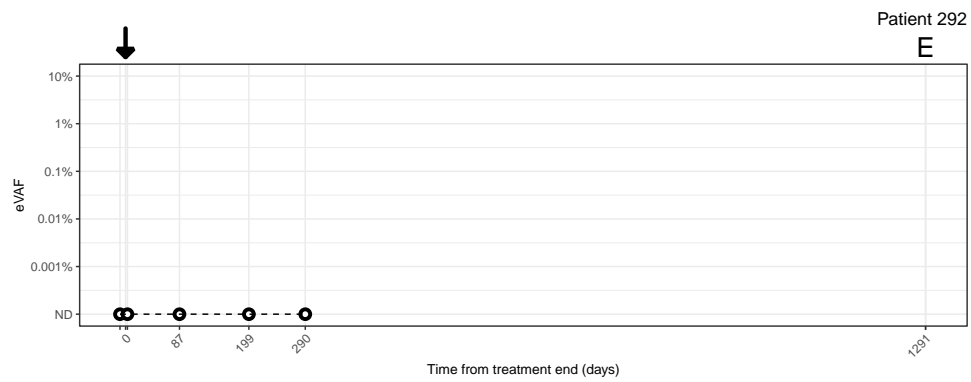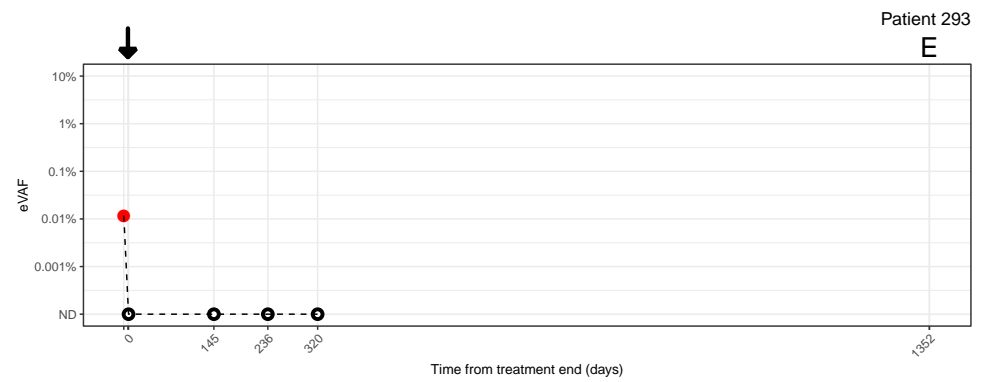

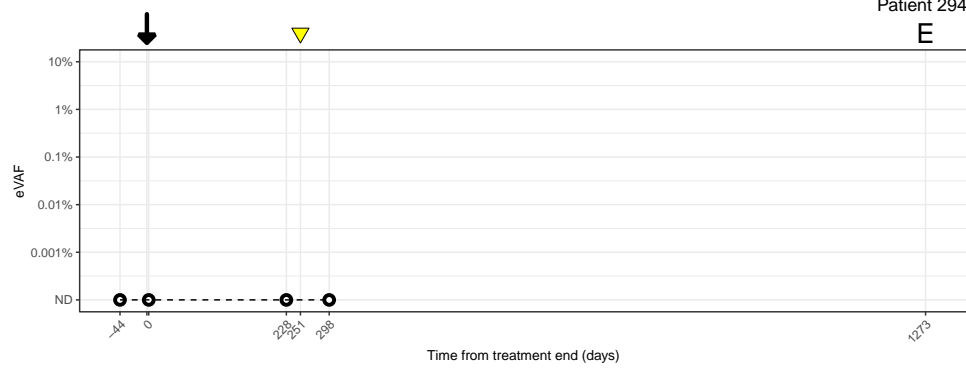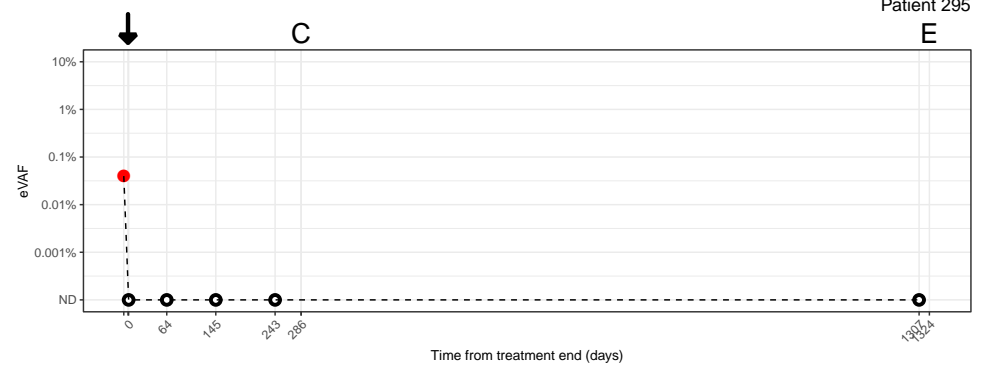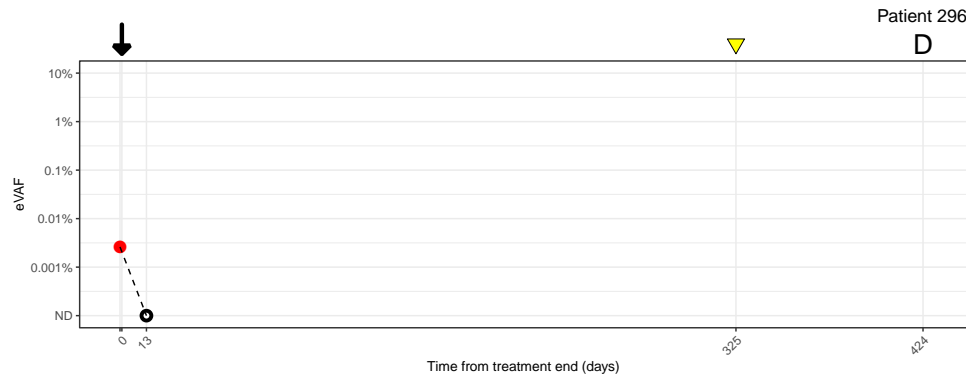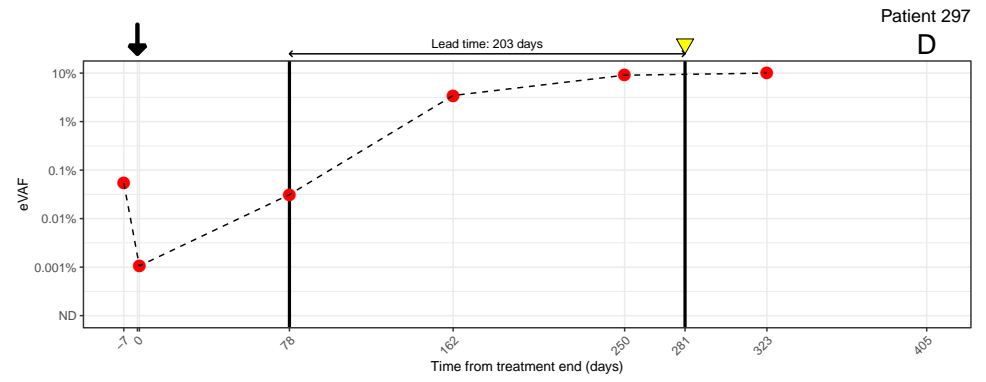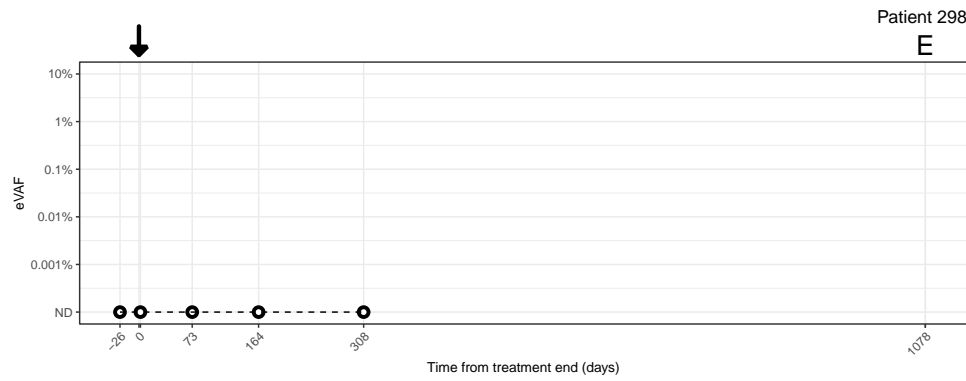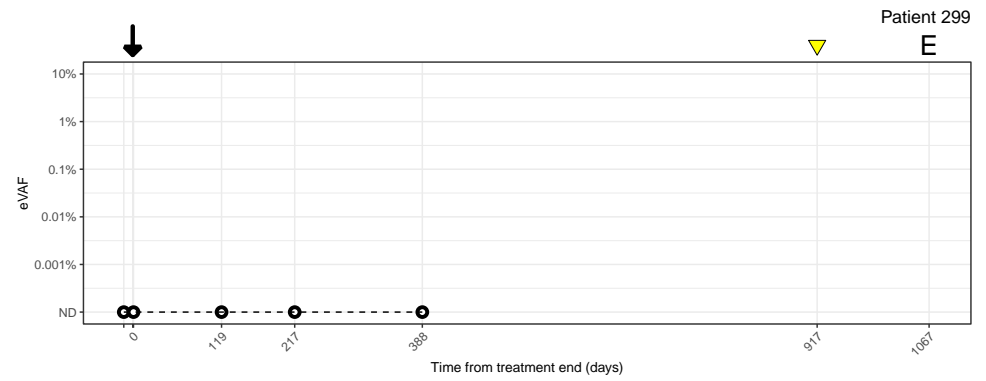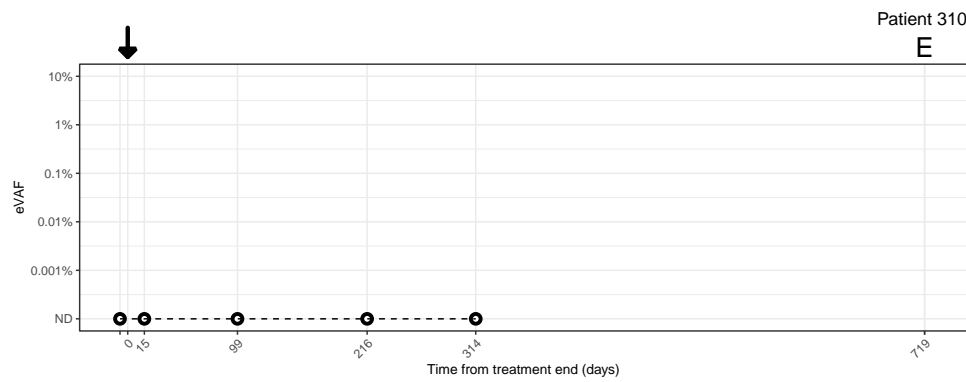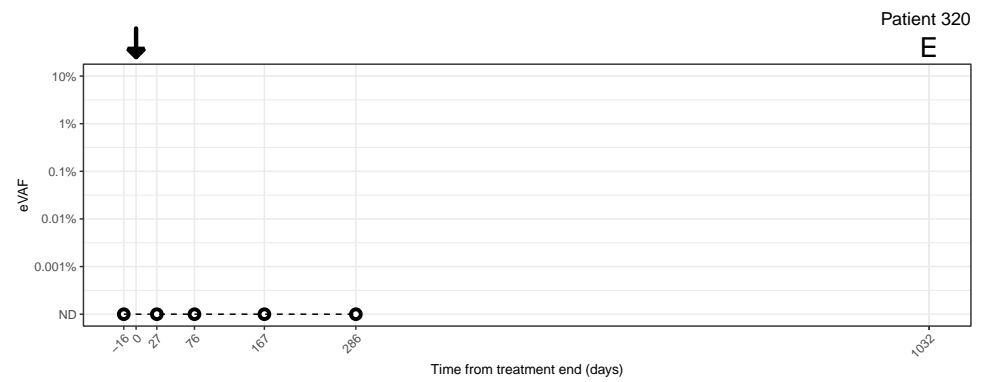

Supplement: mmc3.pdf [file mmc3.pdf]
